# Supplementary material for: Differential Effects of Extracellular Vesicles of Lineage-Specific Human Pluripotent Stem Cells on the Cellular Behaviors of Isogenic Cortical Spheroids
Source: Cells. 2019 Aug 28;8(9):993. doi: 10.3390/cells8090993 (PMC6770916; doi:10.3390/cells8090993)
Supplement: Supplementary file 1 [file cells-08-00993-s001.pdf]

## **Supplementary Materials**

### **Differential Effects of Extracellular Vesicles of Lineage-specific Human Pluripotent Stem Cells on Cellular Behaviors of Isogenic Cortical Spheroids**

Mark Marzano<sup>1</sup>, Julie Bejoy<sup>1</sup>, Mujeeb Cheerathodi<sup>2</sup>, Li Sun<sup>2</sup>, Sara York<sup>2</sup>, Jing Zhao<sup>3</sup>, Takahisa Kanekiyo<sup>3</sup>, Guojun Bu<sup>3</sup>, David Meckes<sup>2</sup>, Yan Li<sup>1,\*</sup>

<sup>1</sup>Department of Chemical and Biomedical Engineering; FAMU-FSU College of Engineering; Florida State University; Tallahassee, FL USA

<sup>2</sup>Department of Biomedical Sciences, College of Medicine, Florida State University, Tallahassee, Florida, USA

<sup>3</sup>Department of Neuroscience, Alzheimer's Disease Research Center, Mayo Clinic, Jacksonville, FL USA

**Supplementary Figure S1. Flow cytometry analysis of undifferentiated iPSCs and neural progenitors.** (A) Two-color flow cytometry analysis of LIVE/DEAD assay stained iPSK3 cells. The plot showed the percentage of viable cells of undifferentiated iPSK3 cells. (B) Flow cytometry analysis of  $\beta$ -tubulin III at day 24 of neural differentiation. The SSC-FSC plot shows the gated cell population. The histogram shows the positive cell population. Black line: negative control; Red line: marker of interest.

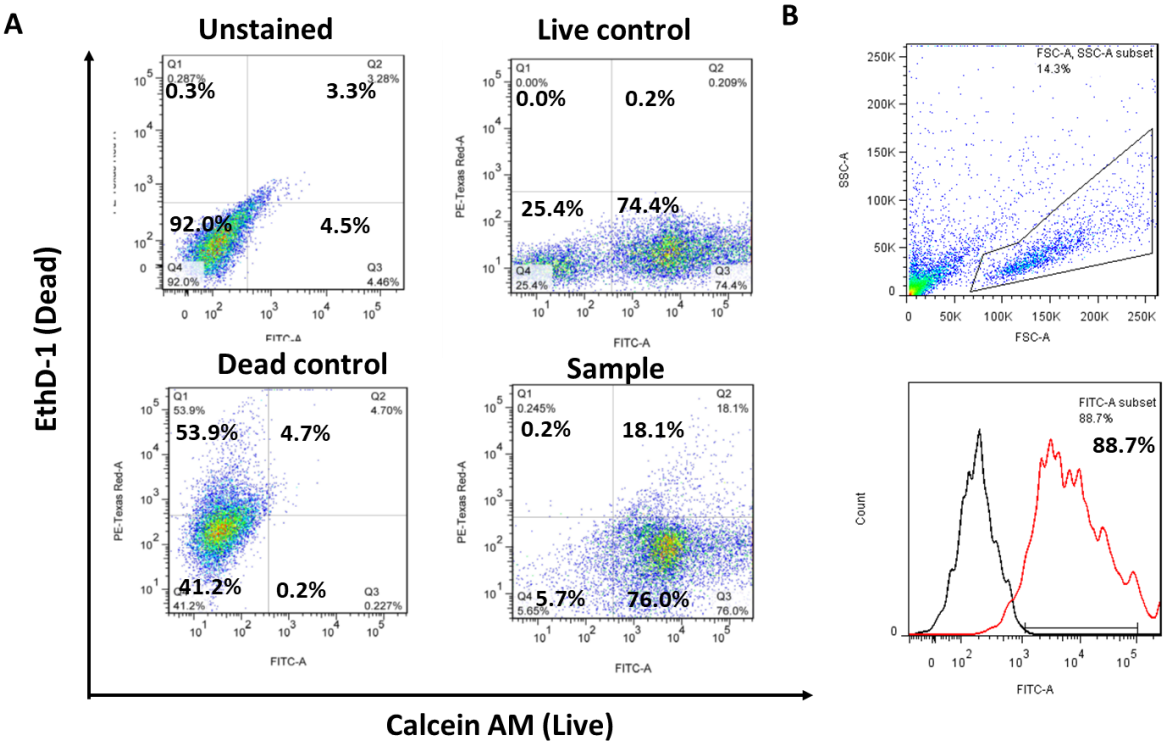

**Supplementary Figure S2. Flow cytometry analysis of cardiac progenitors.** Flow cytometry analysis of  $\alpha$ -actinin was performed for day 20 of cardiac differentiation of iPSK3 cells. The dot plots were used to present the positive cell population.

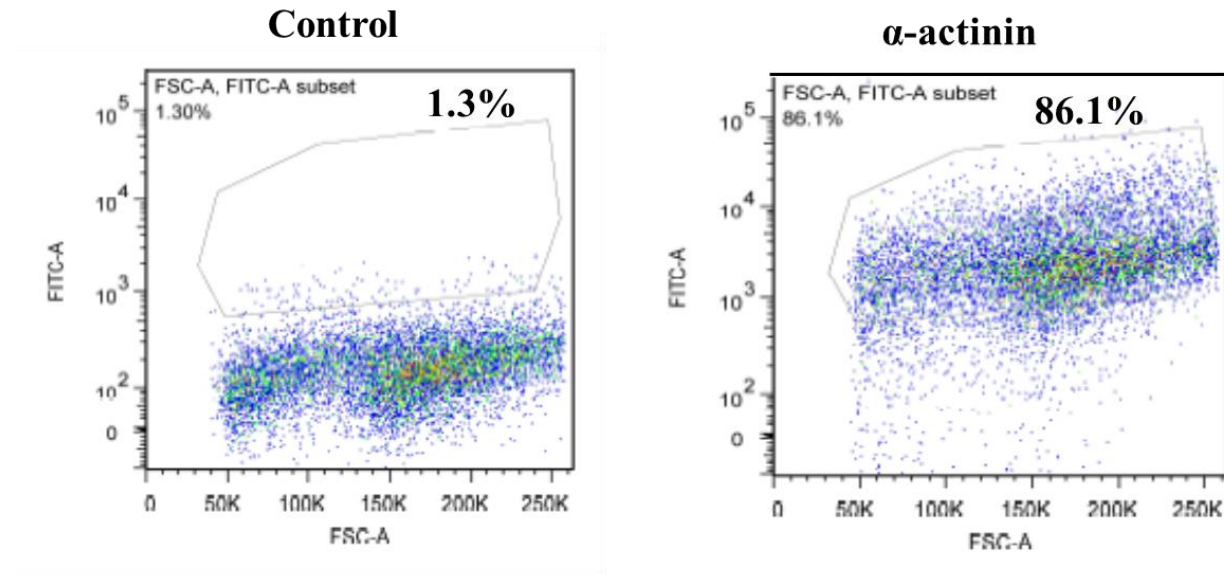

**Supplementary Figure S3. Quantification of Western blot bands for Figure 3A(ii)a.** (i) Alix; (ii) CD63; (iii) TSG101; (iv) Hsc70; (v) Western Blot results showing the absence of Calnexin expression in the derived EVs. Calnexin is a negative marker of EVs (but present in cell lysate). EV markers TSG101 and CD81 are present in both EVs and whole cell lysate (WCE) for iPSK3 and Ecto groups.

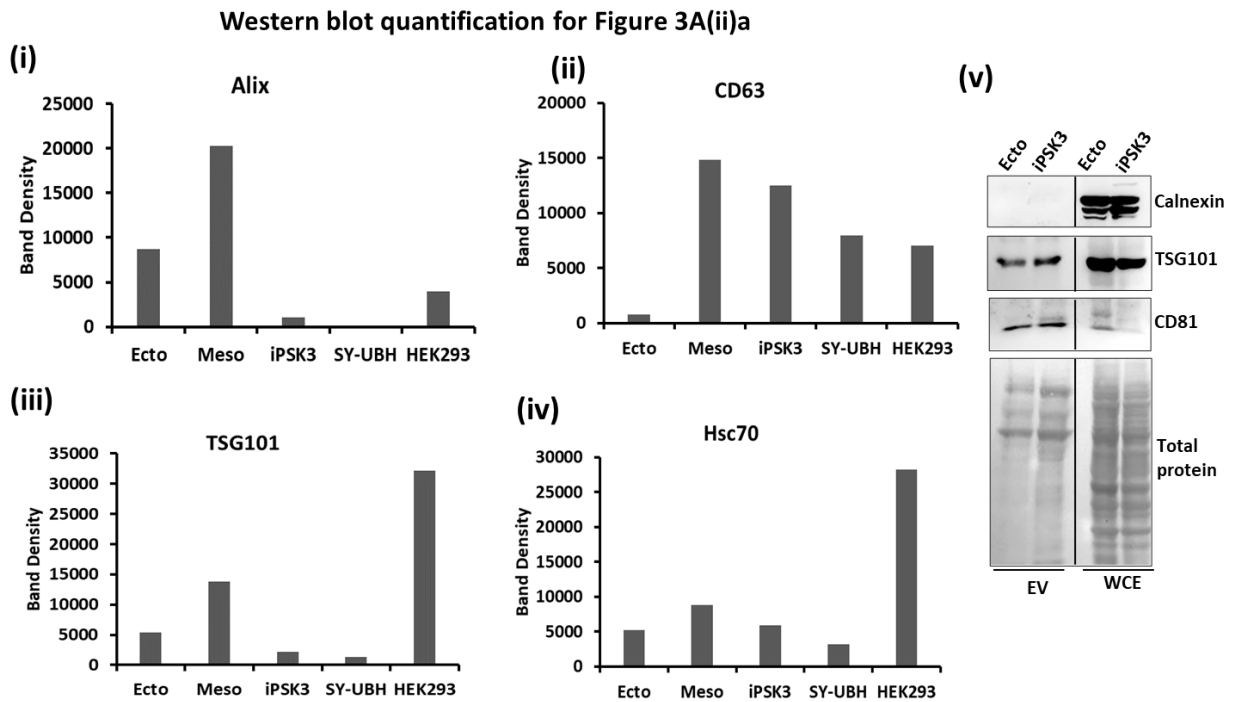

**Supplementary Figure S4. Confirmation of the equal protein loading for Figure 3A(ii)a.** The total protein stain used Ponceau S from Sigma (P7170-1L). Blots were incubated for 5 minutes with rocking prior to washing with water and imaging. EV: extracellular vesicles. WCE: whole cell extracts. NR: non-reducing format.

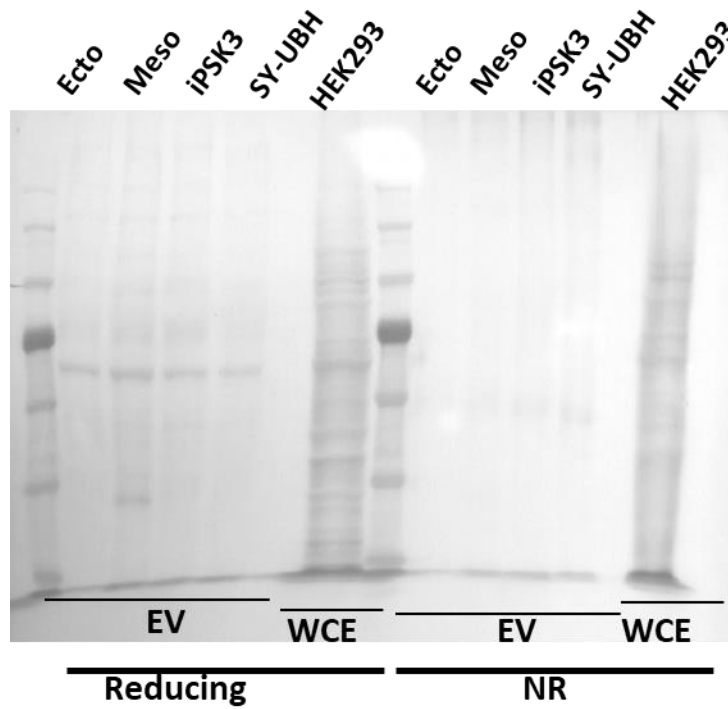

**Supplementary Figure S5. Flow cytometry analysis of iPSC-derived EVs.** Forward scatter and side scatter plots were shown to confirm the presence of iPSC-EVs compared to PBS control.

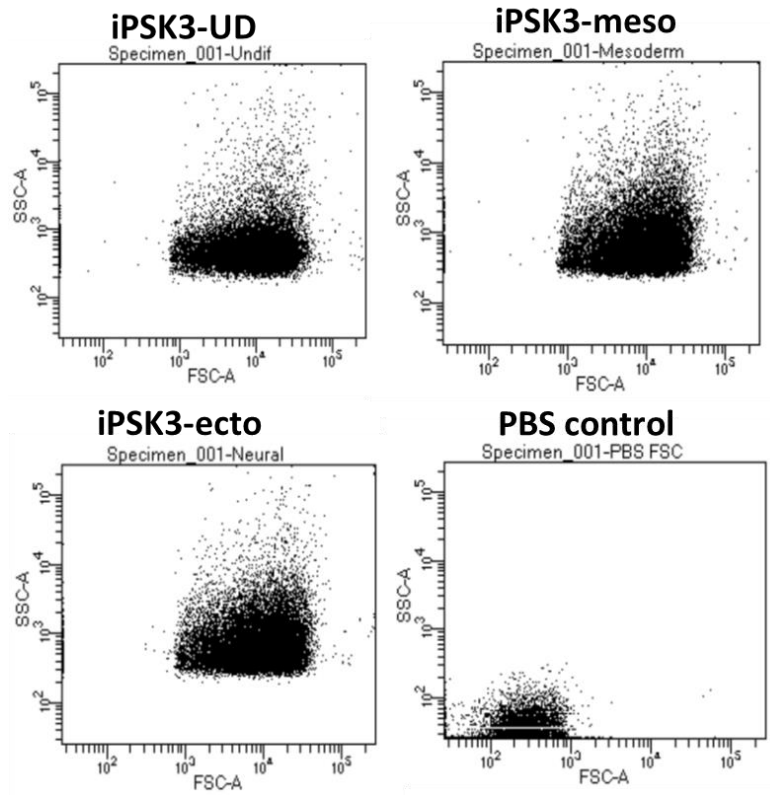

**Supplementary Figure S6. Flow cytometry analysis of LIVE/DEAD assay** (supporting data for Figure 6). (A) Assay was performed for cortical spheroid outgrowth treated with A $\beta$ 42 oligomers or SY-UBH derived-EV in addition to A $\beta$ 42 oligomers. (B) Viability determined by flow cytometry analysis in a separate experiment. (C) Viability determined by flow cytometry analysis in another separate experiment to obtain the result for iPSK3-UD group. In this experiment, the iPSK3-UD group had the increased viability, but not to the level of the Control group.

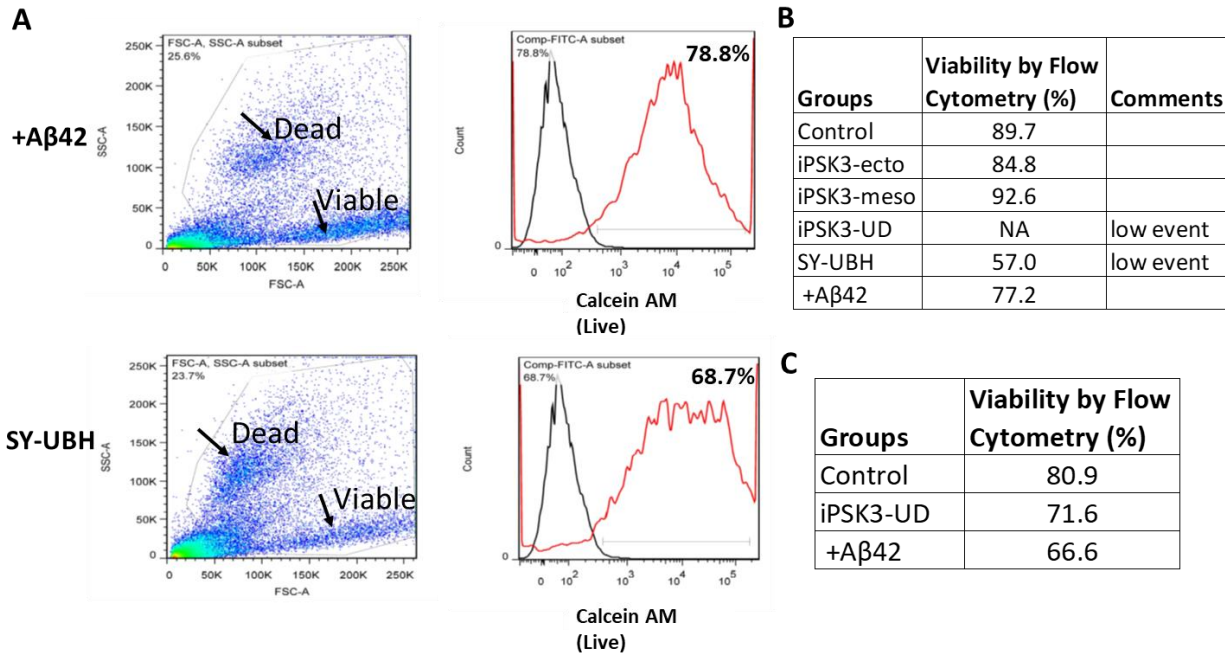

**Supplementary Figure S7. miRNA isolation and detection from iPSC-EVs.** (A) Amplification Ct curve for the cDNA made from the miRNA isolated from three types of iPSC-EVs. (B) Melt curves to show the normal qPCR.

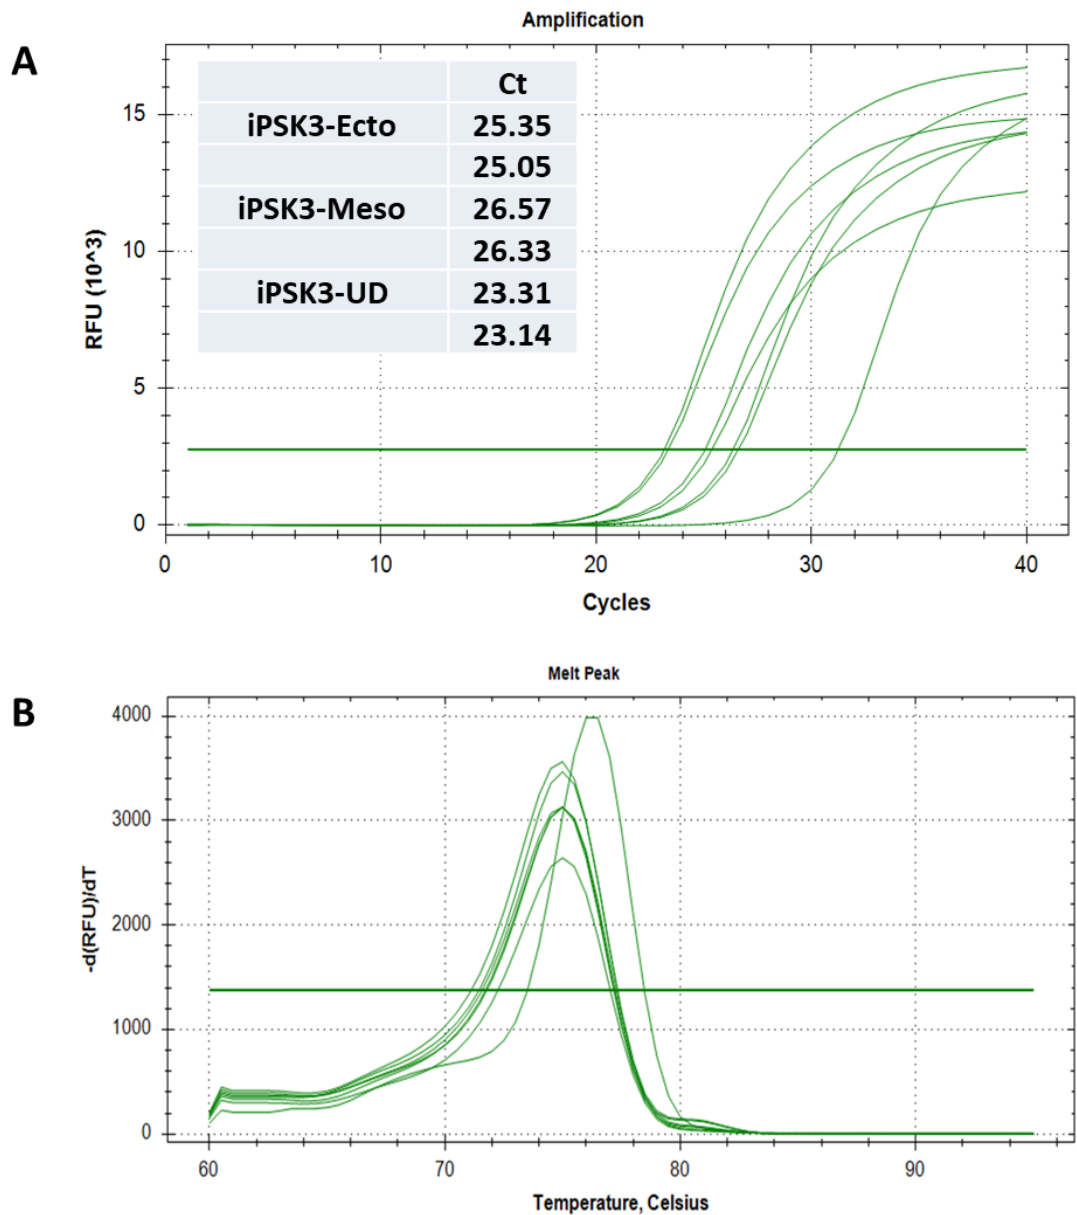

**Supplementary Figure S8. Schematic illustration of crosstalk between miRNAs and canonical Wnt signaling.** Adapted from Nie et al, 2018 (reference 86 in the main text).

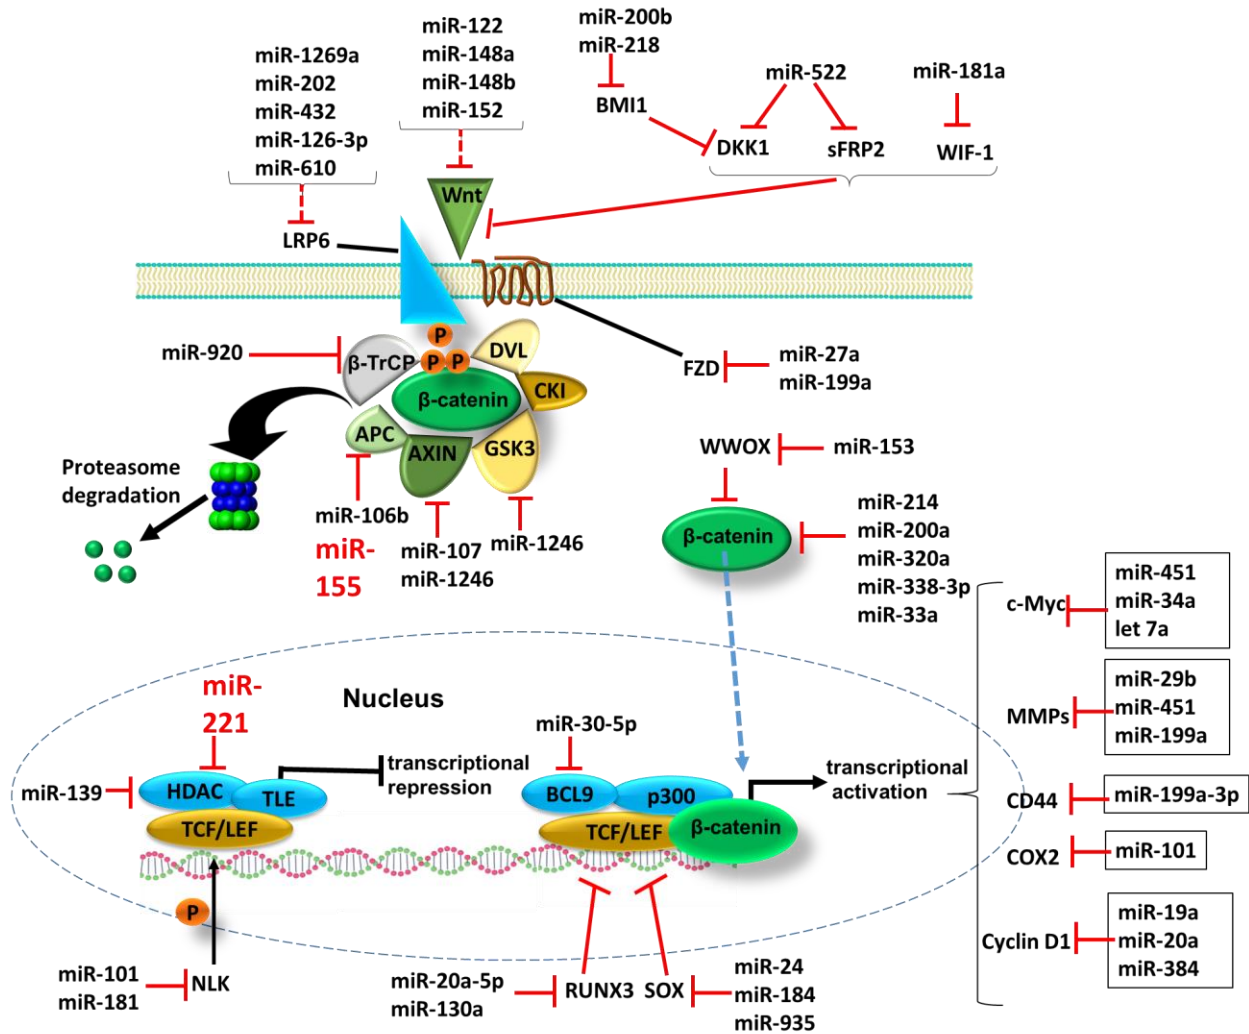

**Supplementary Table S1. A list of antibodies.**

| <b>Cells</b>                | <b>Primary Antibody</b>                        | <b>Origin/ Isotype</b>   | <b>Supplier/ Cat#</b>         | <b>Dilution</b>         |
|-----------------------------|------------------------------------------------|--------------------------|-------------------------------|-------------------------|
| Exosomes                    | CD63                                           | Mouse IgG <sub>1</sub>   | Santa Cruz, SC-5275           | 1:100<br>1:1000<br>(WB) |
|                             | TSG101                                         | Mouse IgG <sub>1</sub>   | Santa Cruz, SC-136111         | 1:100<br>1:1000<br>(WB) |
|                             | Alix                                           | Mouse IgG <sub>1</sub>   | Santa Cruz, SC-49268          | 1:1000<br>WB            |
|                             | Hsc70                                          | Mouse IgG <sub>2a</sub>  | Santa Cruz, SC-7298           | 1:1000<br>WB            |
|                             | CD81                                           | Rabbit<br>Polyclonal IgG | Santa Cruz, SC-9158           | 1:1000<br>WB            |
| Negative exosome<br>marker  | Calnexin                                       | Rabbit<br>Polyclonal IgG | Santa Cruz, SC-11397          | 1:1000<br>WB            |
| Proliferation               | BrdU                                           | Mouse IgG <sub>1</sub>   | Life Technologies, 03-3900    | 1:200                   |
| Mesoderm-<br>cardiomyocytes | $\alpha$ -actinin                              | Mouse IgG <sub>1</sub>   | Sigma, A7811                  | 1:800                   |
|                             | Nkx2.5                                         | Rabbit<br>Polyclonal IgG | Santa Cruz, sc-14033          | 1:400                   |
| Ectoderm-neural<br>cells    | Nestin                                         | Rabbit IgG               | Sigma, N5413                  | 1:100                   |
|                             | Pax6                                           | Mouse IgG <sub>1</sub>   | Santa Cruz, sc-81649          | 1:100                   |
|                             | $\beta$ -tubulin III                           | Mouse IgG <sub>1</sub>   | Millipore, MAB1637            | 1:200                   |
|                             | Glutamate                                      | Rabbit IgG               | Sigma, G6642                  | 1:1000                  |
|                             | GABA                                           | Rabbit IgG               | Sigma, A2052                  | 1:1000                  |
| Secondary                   | Alexa 488, goat<br>anti-mouse IgG <sub>1</sub> | -                        | Life Technologies,<br>A-21121 | 1:200                   |
|                             | Alexa 594, goat<br>anti-rabbit IgG             | -                        | Life Technologies,<br>A-11012 | 1:400                   |

**Supplementary Table S2. NTA analysis for PEG isolation method.**

| Identifier                 | Mode particle size (nm) | Mean particle size (nm) | Standard deviation (nm) | Total particles (E8)/mL |
|----------------------------|-------------------------|-------------------------|-------------------------|-------------------------|
| Particle free PBS          | 240                     | 188                     | 8.6                     | 0.12                    |
| iPSK3 undifferentiated EVs | 134                     | 209                     | 8.9                     | 26                      |
| iPSK3 cardiac mesoderm EVs | 155                     | 183                     | 8.2                     | 29                      |
| iPSK3 ectoderm EVs         | 148                     | 187                     | 8.5                     | 35                      |

**Supplementary Table S3. Comparison of different house-keeping genes for miRNA RT-PCR.**

| Sample    | House-keeping Gene | Ct value |
|-----------|--------------------|----------|
| Ecto EVs  | univ-snord44       | 28.81    |
|           | univ-snord44       | 28.91    |
| Meso EVs  | univ-snord44       | 29.60    |
|           | univ-snord44       | 29.40    |
| ipSK3 EVs | univ-snord44       | 27.56    |
|           | univ-snord44       | 27.56    |
| Ecto EVs  | univ-snord48*      | 26.15    |
|           | univ-snord48*      | 26.52    |
| Meso EVs  | univ-snord48       | 28.78    |
|           | univ-snord48       | 28.36    |
| ipSK3 EVs | univ-snord48       | 27.03    |
|           | univ-snord48       | 26.81    |
| Ecto EVs  | U6 FR              | 19.39    |
|           | U6 FR              | 19.36    |
| Meso EVs  | U6 FR              | 20.50    |
|           | U6 FR              | 20.48    |
| ipSK3 EVs | U6 FR              | 17.38    |
|           | U6 FR              | 17.47    |

\* Bad melting curve.
